# Supplementary material for: Novel disease syndromes unveiled by integrative multiscale network analysis of diseases sharing molecular effectors and comorbidities
Source: BMC Med Genomics. 2018 Dec 31;11(Suppl 6):112. doi: 10.1186/s12920-018-0428-9 (PMC6311938; doi:10.1186/s12920-018-0428-9)
Supplement: Supplementary file 1 — File S1. Comorbid disease pairs (OR > 1.5) sharing molecular mechanisms. In the table we show all the disease pairs resulting comorbid (OR > 1.5 and FDRcomorbidity < 0.05) and with significant convergent mechanisms (FDReRNA < 0.05). Disease1 and disease2 columns represent the disease pair. The related FDRs obtained from the clinical and the molecular datasets are reported in FDRcomorbidity and FDReRNA columns, respectively. We reported also the resulting ORs and FDRs for both the HCUP datasets separated, i.e. NIS13 and NEDS13. For each single dataset there are two OR since they correspond to the beta related to the diseases and we derived two directional FDRs (see Methods). (XLSX 103 kb) [file 12920_2018_428_MOESM1_ESM.xlsx]

## Sheet: comorbidity_rna_ovelrap_or1.5_f
disease1	disease2	FDReRNA	FDRcomorbidity	NIS13.disease1.beta (OR)	NIS13.disease1.beta (logOR)	NIS13.disease2.beta (OR)	NIS13.disease2.beta (logOR)	NIS13.disease1.fdr	NIS13.disease2.fdr	NEDS13.disease1.beta (OR)	NEDS13.disease1.beta (logOR)	NEDS13.disease2.beta (OR)	NEDS13.disease2.beta (logOR)	NEDS13.disease1.fdr	NEDS13.disease2.fdr
Age-related macular degeneration	Sarcoidosis	0.026822	0.000426088	4.79175	1.5669	2.59787	0.954694	0.000426088	0.0463162	1.00845	0.00841287	0.384636	-0.955457	1	0.333004
AIDS	Autoimmune hepatitis	0.000583337	0.00408681	0.987324	-0.0127571	1.0235	0.0232319	1	1	2.07348	0.729227	2.12065	0.751725	0.00554098	0.00408681
AIDS	Behcet disease	5.81395e-06	0.00250043	0.995861	-0.00414722	1.27096	0.239771	1	0.979789	3.15755	1.1498	3.26031	1.18182	0.00338726	0.00250043
AIDS	Cervical cancer	1.76011e-08	6.53249e-07	4.35877	1.47219	4.73237	1.55443	6.53249e-07	1.51862e-07	7.51752	2.01724	7.62489	2.03142	0.000195364	0.00017449
AIDS	Chronic hepatitis C	0.00556597	0	8.62468	2.15463	7.56211	2.02315	0	0	15.2256	2.72298	15.385	2.73339	0	0
AIDS	Hepatitis B	5.85308e-14	0	15.7335	2.75579	14.5053	2.67451	0	0	31.7597	3.4582	32.0013	3.46578	0	0
AIDS	Hepatocellular carcinoma	1.69792e-12	8.48182e-27	1.61284	0.477997	1.503	0.407464	2.97091e-05	0.000460171	2.69663	0.992004	3.17989	1.15685	5.05437e-20	8.48182e-27
AIDS	Hodgkin disease	3.31464e-09	1.47117e-114	5.07496	1.62432	5.23536	1.65544	5.66357e-91	9.71949e-96	6.48147	1.86895	6.46615	1.86658	7.03304e-115	1.47117e-114
AIDS	Idiopathic membranous nephropathy	1.85017e-13	8.43921e-58	2.13441	0.758191	2.22773	0.800983	1.60285e-07	2.39599e-08	8.20597	2.10486	8.17555	2.10115	5.22999e-58	8.43921e-58
AIDS	IgA nephropathy	2.71914e-11	5.12668e-91	3.5471	1.26613	3.5173	1.25769	7.16412e-13	8.28e-13	14.2678	2.65801	15.2171	2.72242	2.33705e-87	5.12668e-91
AIDS	Interstitial lung disease	0.00352491	8.06578e-34	1.1859	0.170505	1.26415	0.234396	0.118415	0.0210099	2.3034	0.834387	2.55331	0.937392	4.9172e-27	8.06578e-34
AIDS	Kidney disease	2.16247e-05	0	1.58108	0.458107	1.63319	0.490535	1.57434e-210	5.39754e-259	2.32309	0.842896	2.56277	0.941089	0	0
AIDS	Large B-cell lymphoma	2.54058e-08	0.00157922	2.05661	0.721061	2.22449	0.799528	0.222365	0.158769	5.41987	1.69007	5.74273	1.74794	0.00232468	0.00157922
AIDS	Laryngeal squamous cell carcinoma	0.000145577	9.26318e-06	1.91379	0.649083	1.82179	0.599818	0.0204814	0.0350256	2.48333	0.909601	2.95938	1.08498	0.000251104	9.26318e-06
AIDS	Lung adenocarcinoma	1.23079e-07	2.00105e-09	0.918906	-0.0845718	0.957134	-0.0438119	0.529265	0.895095	1.12249	0.115551	1.54262	0.433485	0.196295	2.00105e-09
AIDS	Lung Cancer	8.63646e-06	4.59491e-21	0.858236	-0.152876	0.877096	-0.131139	0.00638965	0.0220555	1.12049	0.113769	1.54192	0.433028	0.0288111	4.59491e-21
AIDS	Lymphoma	1.13301e-05	0	11.433	2.43651	11.3694	2.43092	0	0	9.09914	2.20818	11.5579	2.44737	2.19949e-163	5.92742e-198
AIDS	Marginal zone lymphoma	6.14678e-11	1.16362e-06	2.1323	0.757201	2.40849	0.878999	0.138913	0.0745211	4.04293	1.39697	6.23254	1.82978	0.000271287	1.16362e-06
AIDS	Nodular sclerosis Hodgkin lymphoma	1.47522e-06	0.00120166	1.55292	0.440137	2.37785	0.866197	0.440185	0.0543765	5.57837	1.7189	5.96694	1.78623	0.00192104	0.00120166
AIDS	Psoriasis	1.32417e-09	1.82566e-16	1.92739	0.656167	1.81617	0.596728	1.82566e-16	8.3968e-14	1.63688	0.492795	1.63651	0.492565	3.43464e-11	3.51167e-11
AIDS	Psychosis	0.000297295	2.16622e-163	0.987285	-0.0127966	1.06745	0.0652697	0.885218	0.0154925	1.69758	0.529205	1.71101	0.537082	1.58622e-158	2.16622e-163
AIDS	Schizophrenia	1.68628e-07	1.2506e-203	1.04643	0.045388	1.10398	0.0989217	0.277008	0.00415202	2.12203	0.752373	2.1363	0.759075	5.4817e-200	1.2506e-203
AIDS	Vitiligo	1.10113e-08	1.17359e-05	1.8587	0.619879	1.71695	0.540552	0.0418975	0.0849765	3.33171	1.20349	3.34439	1.20728	1.2553e-05	1.17359e-05
Allergic dermatitis	Allergy	1.27259e-09	0	12694.7	9.44894	13403	9.50324	2.3236e-59	4.50152e-62	3274.36	8.09388	3067.83	8.02873	0	0
Allergic dermatitis	Alzheimer disease	2.31076e-05	2.22642e-73	19.169	2.95329	2.05888	0.722162	2.22642e-73	3.22788e-05	26.6892	3.28426	0.980755	-0.0194322	1.6289e-79	1
Allergic dermatitis	Asthma	7.41566e-15	0	1.44102	0.365352	1.76679	0.569165	1.31368e-20	1.28163e-49	0.266362	-1.3229	0.266705	-1.32161	0	0
Allergic dermatitis	Coronary heart disease	1.09925e-06	8.37909e-60	1.7321	0.549335	0.511694	-0.670029	3.28079e-10	2.02642e-15	2.21137	0.79361	0.28887	-1.24178	4.9765e-25	8.37909e-60
Allergic dermatitis	Inflammatory skin disease	0.0359942	3.35036e-41	2.7229	1.0017	4.16274	1.42617	3.35036e-41	7.42374e-85	0.942756	-0.0589476	0.933328	-0.0689989	0.108564	0.050706
Allergic dermatitis	Interstitial lung disease	7.83579e-07	0.343427	1.28103	0.247662	2.2257	0.800073	0.343427	6.31569e-05	0.476977	-0.740286	0.935874	-0.0662744	0.00159266	1
Allergic dermatitis	Knee osteoarthritis	0.0171952	5.37302e-08	4.2089	1.4372	1.36941	0.314382	5.37302e-08	0.379782	3.62657	1.28829	0.787824	-0.23848	2.01821e-07	0.537279
Allergic dermatitis	Parkinson disease	7.67088e-06	1.92594e-15	6.41308	1.85834	1.5586	0.443787	1.92594e-15	0.108893	5.74792	1.74884	0.604357	-0.503591	4.15175e-12	0.0865037
Allergic dermatitis	Psoriasis	3.637e-05	3.36338e-21	4.30773	1.46041	2.31368	0.83884	3.36338e-21	1.04875e-07	1.46945	0.384887	1.22352	0.201732	0.00112263	0.130479
Allergic dermatitis	Vitiligo	1.11647e-05	0.0258749	3.4061	1.22557	2.48065	0.90852	0.0780223	0.229236	3.30661	1.19592	2.65066	0.97481	0.00508931	0.0258749
Allergy to grass pollen	Asthma	1.80464e-10	0	2.32889	0.84539	2.33532	0.848149	3.30366e-57	1.78776e-57	0.355571	-1.03403	0.358054	-1.02707	0	0
Allergy to grass pollen	Celiac disease	1.14123e-06	3.28399e-10	2.27071	0.820092	2.29339	0.830032	0.024049	0.0221	0.305795	-1.18484	0.304274	-1.18983	4.0547e-10	3.28399e-10
Allergy	Allergy to grass pollen	4.11044e-07	0.0675083	2.72128e+06	14.8166	5.78365e+08	20.1757	0.0675083	1	6.73007e+07	18.0247	1.65701e+09	21.2283	4.55931e-05	0.524723
Alopecia areata	Celiac disease	8.07711e-07	0.00936179	8.03117	2.08333	8.23528	2.10843	0.00936179	0.00840748	5.61624e-05	-9.78726	0.00176396	-6.3402	1	1
Alopecia areata	Follicular lymphoma	2.55758e-10	0.00366093	25.3915	3.23441	23.4444	3.15463	0.00366093	0.00469732	0.000919778	-6.99138	0.00416045	-5.48213	1	1
Alopecia areata	Hypothyroidism	6.07182e-07	0.00375505	2.12308	0.752867	2.07099	0.728028	0.00375505	0.00518801	2.20646	0.79139	2.06779	0.72648	0.00198109	0.00525226
Alopecia areata	Idiopathic membranous nephropathy	4.98077e-07	0.0132542	3.98791e-05	-10.1297	0.000717686	-7.23948	1	1	18.1541	2.8989	16.4807	2.80219	0.00998182	0.0132542
Alopecia areata	Inflammatory skin disease	1.05299e-07	0.0155284	4.0877	1.40798	4.39767	1.48108	0.0155284	0.00980042	0.905452	-0.0993209	0.965246	-0.0353723	1	1
Alopecia areata	Polycystic ovary syndrome	1.87946e-11	0.0865462	4.39169	1.47971	5.44318	1.69436	0.0865462	0.0456278	3.46932e-05	-10.269	4.07746e-08	-17.0152	1	1
Alopecia areata	Psoriasis	0.00993555	0.0209963	4.6732	1.54184	4.3297	1.4655	0.0209963	0.0295573	2.11736e-05	-10.7628	0.00140739	-6.56602	1	1
Alopecia areata	Vitiligo	1.81997e-13	0.00233256	0.000130045	-8.94763	0.00182134	-6.30818	1	1	29.7379	3.39242	28.5846	3.35287	0.00203659	0.00233256
Alzheimer disease	Frontotemporal dementia	0.0282683	4.52618e-48	5.18545	1.64586	3.69941	1.30817	4.52618e-48	7.0514e-32	4.57443	1.52048	2.96739	1.08768	7.25787e-39	3.67132e-21
Alzheimer disease	Parkinson disease	4.3613e-15	3.65959e-280	1.95455	0.670161	1.69882	0.529936	3.65959e-280	1.01174e-177	1.93199	0.658549	1.6004	0.470256	0	1.7796e-196
Alzheimer disease	Progressive supranuclear palsy	4.41953e-13	0.000848819	1.46224	0.379968	1.23798	0.213485	0.000848819	0.0879474	1.61488	0.479261	1.28146	0.248002	1.88775e-06	0.0222052
Alzheimer disease	Schizophrenia	0.00125945	1.40315e-293	2.80034	1.02974	1.32907	0.28448	1.40315e-293	6.78659e-25	2.72719	1.00327	0.90151	-0.103684	0	0.000151958
Ankylosing spondylitis	Crohn disease	0.00722314	0	9.48297	2.2495	9.72994	2.27521	4.36286e-199	2.51497e-205	15.179	2.71992	14.9248	2.70302	0	0
Ankylosing spondylitis	Psoriasis	1.62605e-05	2.83811e-107	5.26753	1.66156	5.26356	1.66081	6.14161e-57	6.89423e-57	10.1643	2.31888	10.1455	2.31703	1.89022e-107	2.83811e-107
Asthma	Inflammatory skin disease	4.25886e-05	0	2.32273	0.842741	2.32996	0.845853	0	0	0.425859	-0.853647	0.417382	-0.873753	0	0
Asthma	Narcolepsy	1.37374e-11	2.64083e-16	1.57262	0.452741	1.54457	0.434747	2.64083e-16	4.99192e-15	1.40924	0.343048	1.35203	0.301606	2.28066e-14	3.0936e-11
Asthma	Sarcoidosis	3.90833e-06	0	1.9914	0.68884	1.92642	0.655663	1.794e-227	8.96087e-202	2.15747	0.768935	1.97372	0.679919	0	0
Asthma	Wegener granulomatosis	3.63844e-07	1.51601e-28	1.91013	0.64717	1.88671	0.634833	1.51601e-28	2.12883e-27	1.80166	0.588707	1.73277	0.54972	3.29892e-24	4.55788e-21
Autoimmune hepatitis	Celiac disease	1.10449e-20	2.69946e-36	6.77945	1.9139	6.86341	1.9262	1.07581e-33	3.95434e-34	9.36403	2.23688	9.30816	2.23089	1.73003e-36	2.69946e-36
Autoimmune hepatitis	Chronic hepatitis C	3.10286e-09	1.368e-21	1.5315	0.426247	1.49289	0.400717	0.0205242	0.0313689	4.13604	1.41974	4.11499	1.41464	9.63484e-22	1.368e-21
Autoimmune hepatitis	Crohn disease	1.45559e-07	1.03708e-18	1.60863	0.475385	1.63366	0.490822	0.00547224	0.00397961	3.24362	1.17669	3.23666	1.17454	9.12989e-19	1.03708e-18
Autoimmune hepatitis	Drug-induced hepatitis	2.54547e-08	5.44855e-15	1.92056	0.652618	1.84098	0.6103	0.0097345	0.0169254	5.47073	1.69941	5.36303	1.67953	2.53819e-15	5.44855e-15
Autoimmune hepatitis	Hepatitis B	2.25171e-12	1.75529e-54	1.22481	0.202785	1.19851	0.181082	0.802271	0.856667	11.5526	2.44691	11.4609	2.43894	7.71238e-55	1.75529e-54
Autoimmune hepatitis	Hepatocellular carcinoma	3.78139e-11	2.78832e-48	8.87566	2.18331	8.93473	2.18995	2.78832e-48	1.70396e-48	9.71935	2.27412	10.5417	2.35534	2.27758e-24	4.69291e-26
Autoimmune hepatitis	Hypothyroidism	2.42795e-07	3.78852e-74	1.62067	0.482841	1.6221	0.483722	2.49723e-27	1.41439e-27	2.20813	0.792147	2.33422	0.847677	1.2865e-64	3.78852e-74
Autoimmune hepatitis	Idiopathic membranous nephropathy	5.07532e-14	0.000300143	1.99012	0.688193	1.98562	0.68593	0.314847	0.317164	7.13622	1.96518	7.05167	1.95326	0.000272685	0.000300143
Autoimmune hepatitis	Inflammatory bowel disease	0.000175349	9.20722e-75	3.54047	1.26426	3.57499	1.27396	9.03669e-48	1.97197e-48	5.20497	1.64961	5.18112	1.64502	3.88116e-75	9.20722e-75
Autoimmune hepatitis	Interstitial lung disease	5.99235e-06	1.40338e-05	1.78137	0.57738	1.78918	0.581759	0.00758415	0.00707211	2.70655	0.995674	2.81334	1.03437	3.10565e-05	1.40338e-05
Autoimmune hepatitis	Kawasaki disease	0.00305635	4.24567e-05	0.000196944	-8.53259	3.9764e-05	-10.1325	1	1	11.735	2.46257	22.2841	3.10387	0.00148941	4.24567e-05
Autoimmune hepatitis	Kidney disease	6.6382e-12	7.4359e-46	1.33408	0.288239	1.38156	0.323216	4.70129e-13	2.11588e-16	1.71407	0.538873	1.79006	0.582248	4.9219e-39	7.4359e-46
Autoimmune hepatitis	Lupus erythematosus	1.41549e-15	0	7.73578	2.04586	7.87766	2.06403	2.17139e-208	2.92103e-211	12.0986	2.49309	11.9922	2.48426	0	0
Autoimmune hepatitis	Lymphoma	4.71863e-12	0.00101268	1.42745	0.355892	1.40766	0.341929	0.531677	0.558286	3.94716	1.373	4.327	1.46487	0.00224903	0.00101268
Autoimmune hepatitis	Marginal zone lymphoma	2.86428e-08	2.4686e-12	1.87704	0.629695	1.95987	0.672877	0.810003	0.776092	22.5171	3.11427	25.6756	3.24554	1.94524e-11	2.4686e-12
Autoimmune hepatitis	Multiple sclerosis	0.00025185	0.0246441	1.07626	0.0734876	1.08056	0.0774812	1	1	1.65582	0.504295	1.6305	0.488884	0.0197328	0.0246441
Autoimmune hepatitis	Psoriasis	0.00022574	2.43701e-06	2.23115	0.802518	2.20366	0.790118	2.43701e-06	3.56822e-06	2.35102	0.854847	2.33753	0.849096	0.000141388	0.000158526
Autoimmune hepatitis	Rheumatoid arthritis	9.79545e-11	3.63752e-61	2.57344	0.945243	2.57191	0.944651	1.29149e-34	1.14509e-34	3.64569	1.29355	3.72495	1.31505	2.80496e-59	3.63752e-61
Autoimmune hepatitis	Sarcoidosis	0.0160909	0.00237796	1.82876	0.603639	1.80925	0.592911	0.0183956	0.0209605	2.31909	0.841175	2.31033	0.837389	0.00225656	0.00237796
Autoimmune hepatitis	Systemic lupus erythematosus	3.09747e-13	0	7.8139	2.0559	7.96507	2.07507	4.20873e-205	4.57285e-208	11.9259	2.47872	11.8263	2.47032	0	0
Autoimmune hepatitis	Systemic sclerosis	8.99625e-16	1.38872e-65	6.90197	1.93181	6.79756	1.91656	2.85536e-27	7.31766e-27	16.713	2.81619	16.824	2.82281	2.63403e-65	1.38872e-65
Autoimmune hepatitis	Type 1 diabetes	7.86935e-14	2.93167e-19	1.02648	0.0261358	1.07073	0.068338	1	0.931412	2.87879	1.05737	2.89394	1.06262	4.74316e-19	2.93167e-19
Autoimmune hepatitis	Ulcerative colitis	1.48145e-08	1.05235e-82	6.86904	1.92702	6.8763	1.92808	6.91742e-78	5.96122e-78	10.2415	2.32645	10.2402	2.32632	1.01735e-82	1.05235e-82
Autoimmune hepatitis	Vitiligo	1.79359e-05	9.1446e-14	1.98923	0.687747	1.98057	0.683385	0.554301	0.558414	18.2591	2.90466	18.2862	2.90615	9.41809e-14	9.1446e-14
Azoospermia	Chronic hepatitis C	7.50633e-13	0.0457552	12.1434	2.49679	8.44205	2.13323	0.0457552	0.0953408	7.9721e-06	-11.7396	0.0154477	-4.1703	1	1
Azoospermia	Cystic fibrosis	1.1645e-10	8.45593e-09	8.25814e-07	-14.0069	0.00196589	-6.23181	1	1	741.724	6.60898	962.287	6.86931	2.36107e-07	8.45593e-09
Azoospermia	Myasthenia gravis	3.1922e-11	1.43783e-05	141.426	4.95177	120.037	4.7878	1.43783e-05	2.11275e-05	1.38111e-05	-11.19	0.00802448	-4.82526	1	1
Azoospermia	Sarcoidosis	2.34102e-07	0.000234398	78.5063	4.36318	68.4968	4.22679	0.000234398	0.000336129	1.61711e-05	-11.0323	0.0231557	-3.76552	1	1
Basal cell carcinoma	Melanoma	4.03129e-05	6.94894e-30	4.05023	1.39877	4.04928	1.39854	1.81914e-21	1.85171e-21	5.23112	1.65463	5.1257	1.63427	1.2441e-30	6.94894e-30
Behcet disease	Crohn disease	0.00324053	6.02016e-41	4.85669	1.58036	4.7004	1.54765	7.55107e-15	3.07718e-14	8.58262	2.14974	8.48513	2.13832	2.14896e-41	6.02016e-41
Behcet disease	Lupus erythematosus	2.23031e-05	2.47992e-13	4.74346	1.55677	4.54144	1.51324	2.47992e-13	1.17196e-12	3.70919	1.31081	3.6313	1.28959	2.56435e-09	4.75174e-09
Behcet disease	Rheumatoid arthritis	0.0129768	1.05669e-51	4.7934	1.56724	4.51859	1.5082	1.2847e-20	1.62592e-19	7.40131	2.00166	7.91859	2.06921	1.19703e-47	1.05669e-51
Behcet disease	Systemic lupus erythematosus	0.008491	1.09692e-11	4.51619	1.50767	4.33459	1.46663	1.09692e-11	4.08478e-11	3.83231	1.34347	3.7525	1.32242	9.71406e-10	1.82001e-09
Behcet disease	Vitiligo	0.00223459	9.2767e-09	14.9377	2.70389	14.3587	2.66436	0.000433646	0.000537234	32.0119	3.46611	31.8561	3.46123	8.79144e-09	9.2767e-09
Breast cancer	Ovarian cancer	0.0013712	5.85878e-33	1.12986	0.122093	1.14194	0.132731	0.05404	0.0331249	2.00453	0.695409	2.00719	0.696735	8.0747e-33	5.85878e-33
Carotid atherosclerosis	Kawasaki disease	2.86428e-08	0.00844153	0.00102167	-6.88632	0.000139601	-8.87672	1	1	3.0586	1.11796	19.4397	2.96732	0.472428	0.00844153
Celiac disease	Chronic lymphocytic leukemia	5.6982e-14	0.0157159	1.16639	0.153912	1.16177	0.149947	0.680306	0.695689	1.79745	0.58637	1.75249	0.56104	0.0109147	0.0157159
Celiac disease	Crohn disease	8.30398e-10	8.45113e-117	2.40821	0.878882	2.37771	0.866139	2.90167e-29	2.18375e-28	4.31667	1.46248	4.31271	1.46157	6.20752e-117	8.45113e-117
Celiac disease	Cystic fibrosis	9.52399e-08	2.83954e-05	2.09859	0.741265	2.08999	0.737158	2.83954e-05	3.4681e-05	2.58538	0.949874	2.64794	0.973781	0.00727312	0.00574042
Celiac disease	Graves disease	6.55591e-07	4.59762e-29	3.57233	1.27322	3.55893	1.26946	2.94961e-16	3.65201e-16	4.66132	1.5393	4.65906	1.53881	4.42377e-29	4.59762e-29
Celiac disease	Hepatitis B	4.30771e-13	0.0280261	1.01014	0.0100888	1.0083	0.00826405	1	1	1.7497	0.559446	1.73779	0.552613	0.0257637	0.0280261
Celiac disease	Hepatocellular carcinoma	4.74061e-12	0.00847134	1.14172	0.132532	1.13759	0.128908	0.916379	0.927569	2.21866	0.796901	2.14417	0.762754	0.00560666	0.00847134
Celiac disease	Hypothyroidism	1.41997e-07	1.66019e-264	1.54911	0.437683	1.55719	0.44288	1.64779e-53	7.97325e-55	2.45889	0.89971	2.54467	0.934001	2.91624e-247	1.66019e-264
Celiac disease	Idiopathic membranous nephropathy	5.25116e-14	0.00952438	1.61726	0.480736	1.59739	0.468371	0.423932	0.44171	3.29201	1.1915	3.28587	1.18963	0.00939867	0.00952438
Celiac disease	Inflammatory bowel disease	1.4424e-08	1.74887e-159	2.27872	0.823616	2.25693	0.814005	1.78896e-36	1.38771e-35	4.3516	1.47054	4.34898	1.46994	1.32701e-159	1.74887e-159
Celiac disease	Lupus erythematosus	1.67835e-15	1.3452e-39	2.54167	0.932821	2.52014	0.924313	6.76654e-30	2.50503e-29	2.5687	0.943399	2.55834	0.939359	6.29064e-40	1.3452e-39
Celiac disease	Lymphoma	1.60304e-12	8.61462e-05	2.03948	0.712693	2.01421	0.700226	0.000249008	0.000326919	3.13618	1.14301	3.08353	1.12607	6.55963e-05	8.61462e-05
Celiac disease	Narcolepsy	2.47102e-12	3.14091e-10	2.1375	0.759636	2.14891	0.76496	0.0216698	0.0206071	4.67008	1.54118	4.66724	1.54057	3.08809e-10	3.14091e-10
Celiac disease	Psoriasis	0.00131934	2.55439e-07	1.78748	0.580808	1.7829	0.578239	2.55439e-07	2.90444e-07	1.90266	0.643255	1.89963	0.641658	3.06358e-06	3.256e-06
Celiac disease	Rheumatoid arthritis	6.86602e-13	1.32047e-30	1.60107	0.47067	1.59502	0.466888	1.03267e-13	1.63602e-13	2.01524	0.700738	2.0507	0.718181	3.22836e-29	1.32047e-30
Celiac disease	Sarcoidosis	0.00194441	0.00138923	1.82716	0.602761	1.8061	0.591168	0.00138923	0.00176131	1.53909	0.431191	1.54437	0.434613	0.0358264	0.0340932
Celiac disease	Systemic lupus erythematosus	3.42563e-14	1.76852e-36	2.5059	0.918646	2.48496	0.910257	1.82332e-27	6.06645e-27	2.52691	0.926995	2.51624	0.922764	8.3965e-37	1.76852e-36
Celiac disease	Systemic sclerosis	1.22969e-13	1.53654e-06	2.31291	0.838509	2.28721	0.827332	0.000141705	0.000177355	3.05719	1.1175	3.11084	1.13489	2.27474e-06	1.53654e-06
Celiac disease	Type 1 diabetes	8.29366e-15	0	4.36351	1.47328	4.37243	1.47532	1.23772e-192	1.37516e-191	6.00469	1.79254	6.00316	1.79229	0	0
Celiac disease	Ulcerative colitis	1.16471e-07	3.37001e-45	1.98876	0.687511	1.97573	0.680936	7.29647e-09	1.03701e-08	4.35555	1.47145	4.35464	1.47124	3.27419e-45	3.37001e-45
Celiac disease	Vitiligo	3.40558e-05	7.32674e-09	4.12415	1.41686	4.16595	1.42695	0.000585583	0.00052801	7.48917	2.01346	7.48767	2.01326	7.30336e-09	7.32674e-09
Cervical cancer	Hepatitis B	1.75489e-07	0.00434529	1.33695	0.290389	1.35349	0.302683	0.912233	0.89558	9.3783	2.2384	9.41675	2.24249	0.0044386	0.00434529
Cervical cancer	Lupus erythematosus	5.46741e-06	0.00608554	0.710685	-0.341526	0.675218	-0.39272	0.5226	0.425935	3.05662	1.11731	2.98848	1.09476	0.00498506	0.00608554
Cervical cancer	Systemic lupus erythematosus	0.00772124	0.0239952	0.736097	-0.306393	0.699781	-0.356988	0.594133	0.491553	2.75032	1.01172	2.68857	0.989011	0.0203976	0.0239952
Chronic hepatitis C	Disc degeneration	0.000528159	3.5557e-33	1.10888	0.103354	1.12779	0.120261	0.0463404	0.0171204	1.53893	0.431089	1.64508	0.497787	4.03909e-25	3.5557e-33
Chronic hepatitis C	Drug-induced hepatitis	3.86289e-10	0	3.14781	1.14671	3.36255	1.2127	1.46815e-152	9.10761e-171	6.6751	1.89838	6.57358	1.88306	0	0
Chronic hepatitis C	Hepatitis B	2.48896e-08	0	13.8111	2.62547	14.231	2.65543	0	0	28.4248	3.34726	28.3245	3.34373	0	0
Chronic hepatitis C	Hepatocellular carcinoma	4.65781e-13	0	22.1648	3.0985	22.2103	3.10055	0	0	29.183	3.37359	33.6112	3.51486	0	0
Chronic hepatitis C	Hodgkin disease	8.24689e-09	0.00334978	0.657489	-0.419327	0.693388	-0.366165	0.0188869	0.0455525	1.60195	0.47122	1.59891	0.46932	0.00320619	0.00334978
Chronic hepatitis C	Idiopathic membranous nephropathy	1.41779e-09	1.37393e-12	2.05777	0.721625	2.2912	0.829075	5.38774e-08	2.9381e-10	3.60305	1.28178	3.59978	1.28087	1.31926e-12	1.37393e-12
Chronic hepatitis C	IgA nephropathy	1.38824e-10	0.000464921	1.68062	0.519165	1.68133	0.519583	0.0126051	0.0125059	2.54302	0.933351	2.67474	0.983852	0.000967641	0.000464921
Chronic hepatitis C	Interstitial lung disease	1.33406e-07	1.47073e-07	1.03914	0.0383955	1.05462	0.0531805	0.887845	0.726426	1.42329	0.352969	1.56118	0.445441	4.39309e-05	1.47073e-07
Chronic hepatitis C	Kidney disease	4.34125e-12	0	1.24601	0.219947	1.30035	0.262631	1.00833e-85	7.63757e-126	1.69633	0.528469	1.89105	0.637132	0	0
Chronic hepatitis C	Knee osteoarthritis	0.00417227	1.84981e-10	0.822143	-0.195841	0.885051	-0.12211	0.0195388	0.194113	1.35392	0.303004	1.62	0.482427	0.000111168	1.84981e-10
Chronic hepatitis C	Large B-cell lymphoma	0.00761249	2.50087e-05	1.42602	0.354888	1.48726	0.396936	0.631831	0.558638	6.16186	1.81838	6.39978	1.85626	3.78762e-05	2.50087e-05
Chronic hepatitis C	Laryngeal squamous cell carcinoma	1.33941e-05	0.000221134	1.47312	0.387384	1.4944	0.401721	0.11643	0.100932	2.0232	0.704679	2.34636	0.852865	0.00285485	0.000221134
Chronic hepatitis C	Lupus erythematosus	1.78591e-08	1.87392e-22	0.974984	-0.0253337	1.032	0.0315026	0.984396	0.908357	1.7117	0.537489	1.69158	0.525662	1.97023e-23	1.87392e-22
Chronic hepatitis C	Lymphoma	3.41852e-14	9.5884e-13	0.822448	-0.19547	0.832427	-0.18341	0.210125	0.249854	2.18239	0.78042	2.64129	0.971267	1.42563e-08	9.5884e-13
Chronic hepatitis C	Marginal zone lymphoma	0.00123053	6.96235e-16	1.67549	0.516106	1.89528	0.639368	0.180128	0.0794438	5.364	1.67971	7.68242	2.03894	3.69154e-11	6.96235e-16
Chronic hepatitis C	Psoriasis	0.0420818	3.25434e-65	1.89886	0.641254	1.88714	0.635064	8.19015e-37	4.13397e-36	2.47208	0.905062	2.47464	0.906096	4.61665e-65	3.25434e-65
Chronic hepatitis C	Psychosis	0.0252136	0	1.4051	0.340105	1.5372	0.429964	7.40343e-85	2.05625e-137	2.16947	0.774485	2.15601	0.76826	0	0
Chronic hepatitis C	Rheumatoid arthritis	8.70455e-09	8.73425e-74	1.2275	0.204983	1.28164	0.248141	9.92914e-08	6.7589e-11	1.69788	0.529382	1.90632	0.645173	5.80171e-50	8.73425e-74
Chronic hepatitis C	Schizophrenia	4.86242e-05	0	1.61879	0.481678	1.79351	0.584174	4.0677e-95	8.84996e-141	2.50533	0.918422	2.47112	0.904671	0	0
Chronic hepatitis C	Systemic lupus erythematosus	5.69995e-10	2.94684e-18	0.973407	-0.0269528	1.0344	0.0338254	0.972783	0.888993	1.65053	0.501099	1.63079	0.489066	4.04547e-19	2.94684e-18
Chronic hepatitis C	Systemic sclerosis	9.63651e-11	0.0167907	0.760827	-0.27335	0.76367	-0.26962	0.282821	0.292064	1.51362	0.414507	1.63077	0.489055	0.0499796	0.0167907
Chronic hepatitis C	Toxic cytopenia	0.00997469	4.79831e-44	2.03704	0.711499	2.05983	0.722624	5.95151e-15	2.24471e-15	3.3335	1.20402	3.69491	1.30696	1.50921e-37	4.79831e-44
Chronic hepatitis C	Vitiligo	7.77064e-07	2.14484e-05	1.59849	0.469059	1.5737	0.453427	0.0832497	0.0967801	3.01931	1.10503	3.01265	1.10282	2.05954e-05	2.14484e-05
Chronic kidney disease	Gout	0.00265671	0	3.05752	1.1176	3.00654	1.10079	0	0	3.22189	1.16997	2.99712	1.09765	0	0
Chronic lymphocytic leukemia	Follicular lymphoma	5.38832e-12	2.14483e-05	2.64212	0.971582	2.37069	0.863181	5.53746e-05	0.000400382	3.93873	1.37086	3.37262	1.21569	1.33473e-06	2.14483e-05
Chronic lymphocytic leukemia	Hepatitis B	1.16187e-13	5.4728e-27	3.42217	1.23027	2.65283	0.975628	5.4728e-27	2.17656e-17	2.41356	0.881104	1.48878	0.397955	1.66927e-07	0.0321107
Chronic lymphocytic leukemia	Hodgkin disease	1.83305e-09	1.65878e-24	3.13625	1.14303	2.91608	1.07024	8.40238e-14	3.11348e-12	5.60065	1.72288	4.60862	1.52793	9.65227e-31	1.65878e-24
Chronic lymphocytic leukemia	Interstitial lung disease	2.63753e-06	0.0003837	1.16154	0.14975	1.20795	0.188927	0.289506	0.147916	1.45943	0.378045	1.53914	0.431225	0.00220693	0.0003837
Chronic lymphocytic leukemia	Large B-cell lymphoma	0.00128336	0.0389532	3.35342	1.20998	3.3697	1.21482	0.0389532	0.0379299	0.000878216	-7.03762	1.75006e-05	-10.9533	1	1
Chronic lymphocytic leukemia	Leprosy	1.54649e-14	1.08457e-15	13.4033	2.5955	12.0737	2.49103	0.0275185	0.0356602	54.2483	3.99357	52.9625	3.96958	1.20085e-15	1.08457e-15
Chronic lymphocytic leukemia	Lymphoma	1.53328e-13	1.80044e-50	3.62901	1.28896	3.33595	1.20476	2.22395e-42	3.36081e-37	6.16719	1.81924	5.51888	1.70817	6.18727e-57	1.80044e-50
Chronic lymphocytic leukemia	Marginal zone lymphoma	0.00202998	5.00531e-30	6.968	1.94133	6.71842	1.90485	2.4914e-21	1.16969e-20	12.3724	2.51547	11.7326	2.46237	5.16501e-31	5.00531e-30
Chronic lymphocytic leukemia	Metabolic syndrome	0.00999943	0.0930976	0.631105	-0.460284	0.543152	-0.610367	0.122899	0.0291126	2.02617	0.706148	1.52976	0.425111	0.0021178	0.0930976
Chronic lymphocytic leukemia	Multiple sclerosis	7.83311e-07	0.824134	0.915306	-0.0884964	0.720183	-0.32825	0.824134	0.0538173	1.63086	0.489107	0.98818	-0.0118902	0.000305685	1
Chronic lymphocytic leukemia	Myasthenia gravis	1.28972e-14	8.36189e-05	0.725387	-0.32105	0.773291	-0.2571	0.256039	0.408223	1.89766	0.640622	1.96866	0.677354	0.000219219	8.36189e-05
Chronic lymphocytic leukemia	Nodular sclerosis Hodgkin lymphoma	1.59491e-15	0.00107226	5.15934	1.64081	5.18936	1.64661	0.0124629	0.0121766	14.3353	2.66272	12.9	2.55723	0.000671422	0.00107226
Chronic obstructive pulmonary disease	Lung adenocarcinoma	6.62964e-05	0	4.15132	1.42343	4.07466	1.40479	0	0	4.39983	1.48157	4.29636	1.45777	0	0
Chronic obstructive pulmonary disease	Lung Cancer	5.43824e-05	0	3.3245	1.20132	3.26011	1.18176	0	0	3.97506	1.38004	3.92424	1.36717	0	0
Chronic obstructive pulmonary disease	Nicotine dependence	2.05513e-08	0	4.05788	1.40066	3.42752	1.23184	0	0	3.13352	1.14216	2.10907	0.746245	0	0
Chronic obstructive pulmonary disease	Schizophrenia	0.00614467	0	1.61039	0.476478	1.52379	0.421199	0	0	1.75382	0.561798	1.40469	0.339819	0	0
Coronary heart disease	Hodgkin disease	2.20166e-08	1.87384e-22	1.2494	0.222661	1.20168	0.18372	7.57453e-11	1.89819e-07	1.63829	0.493653	1.4085	0.342523	6.92191e-45	1.87384e-22
Coronary heart disease	Idiopathic membranous nephropathy	8.1055e-09	1.26029e-09	1.13508	0.126702	1.1246	0.117424	0.0377972	0.0626195	1.68712	0.523025	1.48348	0.39439	3.35582e-16	1.26029e-09
Coronary heart disease	IgA nephropathy	0.000169045	6.10682e-07	1.14838	0.138352	1.11764	0.111223	0.0287521	0.0939031	1.52574	0.422477	1.44772	0.369987	1.44836e-08	6.10682e-07
Coronary heart disease	Interstitial lung disease	2.01739e-07	1.48605e-258	1.38289	0.324178	1.4232	0.352906	5.2744e-93	7.2298e-112	1.62075	0.482891	1.71391	0.538778	7.03727e-201	1.48605e-258
Coronary heart disease	Kawasaki disease	0.019177	9.2361e-81	2.17847	0.778623	55.1816	4.01063	3.43134e-05	1.53949e-86	4.37466	1.47583	38.9733	3.66288	1.34469e-17	9.2361e-81
Coronary heart disease	Kidney disease	4.40775e-09	0	1.5558	0.441987	1.56928	0.450617	0	0	1.83023	0.60444	1.84695	0.613535	0	0
Coronary heart disease	Lupus erythematosus	5.79182e-07	1.54023e-102	1.38295	0.324218	1.19174	0.175418	1.54023e-102	7.55543e-30	1.61779	0.481062	1.17748	0.163381	7.48743e-288	4.10383e-34
Coronary heart disease	Metabolic syndrome	0.00237978	0	2.26354	0.81693	2.11563	0.749351	4.688e-289	1.07572e-226	3.78244	1.33037	3.21397	1.16751	0	0
Coronary heart disease	Myocardial infarction	3.70955e-05	0	15.7681	2.75799	16.1521	2.78205	0	0	12.1331	2.49593	11.5661	2.44808	0	0
Coronary heart disease	Systemic lupus erythematosus	3.05492e-07	3.03984e-104	1.39793	0.334994	1.20196	0.183956	3.03984e-104	3.68036e-31	1.62004	0.482448	1.17358	0.16006	2.279e-277	2.04139e-31
Coronary heart disease	Type 1 diabetes	0.000249737	0	1.62709	0.486796	1.65123	0.50152	0	0	1.82473	0.601431	1.566	0.448526	0	0
Coronary heart disease	Type 2 diabetes	0.00052595	0	2.20987	0.792931	2.04464	0.715224	0	0	2.11517	0.749137	1.8227	0.600319	0	0
Corticobasal degeneration	Parkinson disease	5.10684e-19	1.79856e-45	23.6379	3.16285	27.5194	3.31489	3.82367e-32	7.84248e-36	19.3972	2.96513	24.1301	3.18346	6.58244e-39	1.79856e-45
Crohn disease	Graves disease	5.29403e-11	1.52525e-05	0.927762	-0.0749803	0.90215	-0.102975	0.891597	0.735638	1.59249	0.465302	1.58277	0.459175	1.14407e-05	1.52525e-05
Crohn disease	Lupus erythematosus	4.52408e-09	2.14368e-51	1.45624	0.375855	1.4007	0.336971	4.98418e-13	1.19465e-10	1.76536	0.568355	1.75572	0.562882	2.21536e-52	2.14368e-51
Crohn disease	Narcolepsy	2.05764e-08	0.00603186	0.754001	-0.282361	0.736815	-0.305419	0.413687	0.35835	1.66	0.506817	1.65685	0.504919	0.00580828	0.00603186
Crohn disease	Psoriasis	0.000299991	5.3756e-89	2.12781	0.755092	2.04121	0.713543	8.69687e-53	3.42535e-47	2.52071	0.924539	2.52022	0.924347	4.82897e-89	5.3756e-89
Crohn disease	Rheumatoid arthritis	9.26573e-12	0	2.05845	0.721952	2.00592	0.696104	1.84752e-130	1.2714e-121	2.4757	0.906524	2.60854	0.958792	1.90104e-276	0
Crohn disease	Systemic lupus erythematosus	3.25254e-10	3.05223e-47	1.40958	0.343291	1.35767	0.30577	2.54917e-10	2.25272e-08	1.74463	0.556541	1.73545	0.551265	3.92489e-48	3.05223e-47
Crohn disease	Ulcerative colitis	8.11546e-14	3.37382e-34	1.07176	0.0692978	1.06867	0.0664156	0.557777	0.585563	2.10868	0.746064	2.10893	0.746179	3.40365e-34	3.37382e-34
Cystic fibrosis	Hepatocellular carcinoma	8.17398e-09	4.57024e-06	0.218714	-1.51999	0.244923	-1.40681	0.0715836	0.100833	7.22905	1.97811	5.56868	1.71716	9.74597e-08	4.57024e-06
Cystic fibrosis	Type 1 diabetes	1.14479e-07	1.47764e-47	0.538164	-0.619591	0.454642	-0.788244	4.33355e-10	9.77632e-16	3.664	1.29855	3.15783	1.14988	1.96034e-60	1.47764e-47
Cystic fibrosis	Type 2 diabetes	0.0287086	0	9.27878	2.22773	3.35028	1.20904	0	0	5.0349	1.61639	3.11631	1.13665	0	3.56423e-240
Disc degeneration	Narcolepsy	0.00423922	1.09181e-13	1.91473	0.649577	1.90384	0.643875	9.83127e-08	1.30216e-07	2.44959	0.895923	2.37031	0.86302	1.10756e-14	1.09181e-13
Disc degeneration	Nodular sclerosis Hodgkin lymphoma	0.00148234	0.00501824	0.4715	-0.751836	0.617857	-0.481498	0.353263	0.65462	4.10037	1.41108	4.11891	1.41559	0.00504537	0.00501824
Drug-induced hepatitis	Hepatitis B	1.95399e-10	1.48394e-75	2.78364	1.02376	2.6275	0.966033	2.35839e-31	5.52912e-28	4.80173	1.56898	4.84651	1.57826	1.10999e-74	1.48394e-75
Drug-induced hepatitis	Hepatocellular carcinoma	2.16552e-13	6.23762e-54	2.49655	0.914911	2.38571	0.869496	2.97831e-18	1.47738e-16	4.66209	1.53946	5.51084	1.70672	3.84324e-44	6.23762e-54
Drug-induced hepatitis	Hypertension	0.0208752	1.15176e-218	1.64416	0.497227	1.55193	0.439497	2.18958e-203	1.25233e-182	1.45854	0.377437	1.55567	0.441903	4.32218e-136	1.15176e-218
Duodenal ulcer	Pancreatic cancer	0.0417761	1.72547e-57	3.47049	1.24429	3.43701	1.2346	1.72547e-57	1.33174e-56	3.67055	1.30034	3.52006	1.25848	4.44159e-45	2.85612e-42
Eosinophilic esophagitis	Rheumatoid arthritis	0.000731732	9.97179e-10	2.23849	0.805803	1.66188	0.507947	0.0031325	0.0862198	3.54074	1.26434	3.30268	1.19473	9.75694e-11	9.97179e-10
Follicular lymphoma	Hepatitis B	7.35191e-13	5.71204e-12	4.81846	1.57245	4.58305	1.52237	5.71204e-12	2.9164e-11	5.14086	1.63722	4.12325	1.41664	3.59385e-06	7.53777e-05
Follicular lymphoma	Hodgkin disease	1.85498e-13	0.000368952	3.62774	1.28861	3.72698	1.3156	0.000368952	0.000267773	1.19826	0.180868	1.0858	0.0823129	1	1
Follicular lymphoma	Kidney disease	4.42166e-15	4.74484e-22	0.907082	-0.0975219	0.940056	-0.0618161	0.113274	0.388282	1.65818	0.505718	1.71929	0.541911	5.88925e-19	4.74484e-22
Follicular lymphoma	Large B-cell lymphoma	6.32118e-06	0.00176569	11.3947	2.43315	11.6554	2.45577	0.00176569	0.00158247	28.9687	3.36622	28.7703	3.35934	0.00226708	0.00231519
Follicular lymphoma	Lung Cancer	2.28565e-12	0.0160524	0.821424	-0.196715	0.832809	-0.182951	0.290464	0.34012	1.53431	0.42808	1.52028	0.418895	0.0133072	0.0160524
Follicular lymphoma	Marginal zone lymphoma	2.46192e-05	4.53367e-07	4.60339	1.52679	4.79654	1.56789	0.0698571	0.0610177	20.0405	2.99776	21.485	3.06735	8.62844e-07	4.53367e-07
Follicular lymphoma	Multiple myeloma	0.00442293	0.029049	1.0579	0.0562867	1.09709	0.0926623	1	1	2.24395	0.80824	2.32003	0.841582	0.0375108	0.029049
Follicular lymphoma	Psoriasis	0.000645147	0.000127272	1.29919	0.261738	1.2759	0.243653	0.506605	0.554914	3.22226	1.17008	3.0157	1.10383	4.4087e-05	0.000127272
Follicular lymphoma	Sarcoidosis	8.53915e-08	0.0148809	1.13196	0.123952	1.09146	0.0875128	1	1	3.29967	1.19382	2.65811	0.977614	0.00217913	0.0148809
Frontotemporal dementia	Hypothyroidism	9.80779e-05	1.70921e-06	1.26944	0.23858	1.30287	0.264568	0.0106265	0.00401094	1.42794	0.356233	1.54355	0.434084	0.00011496	1.70921e-06
Frontotemporal dementia	Narcolepsy	1.383e-06	0.000228344	7.3378	1.99304	6.99803	1.94563	0.000228344	0.00033184	0.000133587	-8.92075	0.000539105	-7.5256	1	1
Frontotemporal dementia	Parkinson disease	0.00977225	4.8345e-06	1.65084	0.501283	1.83666	0.607951	0.022897	0.00449729	2.00263	0.694463	2.3076	0.836209	0.000181968	4.8345e-06
Frontotemporal dementia	Schizophrenia	0.000143012	4.86978e-07	2.5233	0.925568	2.15206	0.766427	4.86978e-07	3.22743e-05	2.78456	1.02409	1.87382	0.627978	3.71252e-08	0.00112886
Gout	Hypertriglyceridemia	0.00454993	5.66012e-143	2.02898	0.707531	1.78004	0.576637	2.8713e-96	4.14381e-64	2.58061	0.948026	2.22084	0.797888	2.03484e-201	5.66012e-143
Graves disease	Hypothyroidism	1.11667e-12	0	1.78255	0.578046	1.84887	0.614575	1.27936e-75	2.25242e-86	2.65666	0.97707	3.00549	1.10044	0	0
Graves disease	Inflammatory bowel disease	0.00145563	1.00321e-10	0.876527	-0.131787	0.892009	-0.114279	0.453657	0.551135	1.73322	0.549983	1.73628	0.551745	1.15731e-10	1.00321e-10
Graves disease	Kawasaki disease	0.0081571	0.00519177	9.1153e-05	-9.30297	4.21877e-05	-10.0734	1	1	2.67109	0.982486	9.055	2.20332	0.314298	0.00519177
Graves disease	Lupus erythematosus	1.97596e-15	7.93741e-23	1.65306	0.502626	1.65869	0.506027	2.03578e-07	1.68066e-07	2.0743	0.729622	2.07525	0.73008	8.48549e-23	7.93741e-23
Graves disease	Metabolic syndrome	0.000203804	0.0228143	1.18894	0.173061	1.18749	0.17184	0.76152	0.765267	1.92935	0.657181	1.96126	0.673586	0.0270567	0.0228143
Graves disease	Myasthenia gravis	2.11182e-14	1.19262e-42	4.1902	1.43275	4.42726	1.48778	7.76709e-17	4.45059e-18	6.53936	1.87784	7.1655	1.96928	6.71888e-39	1.19262e-42
Graves disease	Narcolepsy	2.54402e-07	0.0437355	1.19996	0.182291	1.1969	0.179733	0.984016	0.988171	2.19089	0.784309	2.19539	0.786358	0.0443875	0.0437355
Graves disease	Psoriasis	0.000362897	0.000253797	1.39483	0.332774	1.37734	0.320151	0.0533647	0.0653895	1.71126	0.537228	1.71278	0.538117	0.000260344	0.000253797
Graves disease	Rheumatoid arthritis	1.15711e-09	7.23654e-13	1.16878	0.155961	1.188	0.172271	0.103681	0.0653182	1.53487	0.428446	1.64127	0.495472	7.42537e-10	7.23654e-13
Graves disease	Sarcoidosis	0.000458113	3.80653e-11	1.36863	0.313808	1.33272	0.287223	0.150529	0.200602	2.48721	0.911164	2.52071	0.924539	7.47928e-11	3.80653e-11
Graves disease	Systemic lupus erythematosus	6.78404e-08	2.12456e-21	1.6056	0.473495	1.61231	0.477668	2.57701e-06	2.0875e-06	2.05456	0.720061	2.05588	0.720703	2.31882e-21	2.12456e-21
Graves disease	Type 1 diabetes	6.56311e-06	4.07887e-34	1.58942	0.463366	1.79907	0.587268	5.46392e-08	2.75939e-12	2.28874	0.828002	2.34921	0.85408	4.31287e-32	4.07887e-34
Graves disease	Ulcerative colitis	1.93026e-11	6.61195e-07	0.821099	-0.197112	0.82441	-0.193088	0.559893	0.573471	2.12417	0.753383	2.13034	0.756281	7.34797e-07	6.61195e-07
Graves disease	Vitiligo	1.62828e-13	1.0389e-08	3.90695	1.36276	3.88171	1.35628	0.000993021	0.00105748	7.3369	1.99292	7.35152	1.99491	1.07592e-08	1.0389e-08
Graves disease	Vogt-Koyanagi-Harada syndrome	2.45626e-05	0.0328213	0.00188003	-6.27647	1.80898e-05	-10.9202	1	1	11.952	2.4809	12.003	2.48515	0.0331726	0.0328213
Hepatitis B	Hepatocellular carcinoma	1.07759e-16	0	21.0082	3.04491	20.7983	3.03487	0	0	39.9971	3.68881	44.8017	3.80225	0	0
Hepatitis B	Hodgkin disease	6.80932e-15	3.49225e-07	1.83397	0.606484	1.95001	0.667836	0.00132381	0.000342555	2.80455	1.03124	2.80427	1.03114	3.48423e-07	3.49225e-07
Hepatitis B	Idiopathic membranous nephropathy	1.1285e-21	3.52778e-12	1.36879	0.313928	1.48409	0.394799	0.404796	0.247537	5.73181	1.74603	5.73517	1.74662	3.59167e-12	3.52778e-12
Hepatitis B	IgA nephropathy	3.14856e-12	2.2068e-07	1.57356	0.453343	1.57058	0.451444	0.325485	0.328159	5.36373	1.67966	5.60342	1.72338	4.65873e-07	2.2068e-07
Hepatitis B	Interstitial lung disease	2.0938e-07	2.59473e-09	1.18849	0.172682	1.21317	0.193235	0.280874	0.208964	1.97527	0.680705	2.13519	0.758554	1.11838e-07	2.59473e-09
Hepatitis B	Kidney disease	2.26567e-16	0	1.31376	0.272895	1.36485	0.311046	9.76211e-43	3.7559e-57	2.25915	0.814988	2.4454	0.894207	0	0
Hepatitis B	Large B-cell lymphoma	2.54058e-08	0.00025264	2.52013	0.924309	2.91399	1.06952	0.14309	0.0761007	9.5973	2.26148	9.9034	2.29288	0.00031355	0.00025264
Hepatitis B	Leprosy	3.38079e-09	0.0355361	5.57815	1.71886	6.08659	1.80609	0.0492762	0.0357225	11.4327	2.43647	11.6797	2.45785	0.0375615	0.0355361
Hepatitis B	Lung Cancer	4.11973e-13	1.71158e-28	1.11887	0.112319	1.17552	0.161709	0.0758003	0.00605882	1.50209	0.406859	1.88445	0.633638	2.65896e-12	1.71158e-28
Hepatitis B	Lymphoma	1.51476e-12	8.48128e-39	3.61064	1.28388	3.69093	1.30588	1.78087e-34	8.70736e-36	5.78961	1.75607	6.78942	1.91536	8.61079e-33	8.48128e-39
Hepatitis B	Marginal zone lymphoma	5.37946e-09	8.92128e-11	4.9784	1.60511	5.38955	1.68446	2.04422e-06	6.04373e-07	8.09311	2.09101	10.9007	2.38883	1.7133e-08	8.92128e-11
Hepatitis B	Multiple myeloma	2.30102e-05	2.06234e-20	1.45094	0.372209	1.53042	0.42554	0.00547463	0.00122181	2.37331	0.864286	3.16254	1.15138	6.22635e-12	2.06234e-20
Hepatitis B	Prostate cancer	1.26469e-09	0.0350944	0.00350542	-5.65345	4.45274e-07	-14.6246	1	1	7.04374	1.95214	11.7744	2.46593	0.113578	0.0350944
Hepatitis B	Psoriasis	4.72676e-09	9.76907e-11	1.57221	0.45248	1.56427	0.44742	1.88451e-05	2.35431e-05	1.98904	0.687651	1.99268	0.689482	1.10294e-10	9.76907e-11
Hepatitis B	Psychosis	0.000409093	1.96553e-92	1.14603	0.136307	1.23941	0.214636	0.000122711	3.01859e-10	1.88027	0.631418	1.87562	0.628937	6.44469e-93	1.96553e-92
Hepatitis B	Rheumatoid arthritis	7.88985e-13	6.1676e-21	1.23084	0.207696	1.2726	0.241059	0.00586122	0.00108501	1.65807	0.505652	1.8422	0.610962	1.23031e-14	6.1676e-21
Hepatitis B	Sarcoidosis	5.58704e-06	6.12402e-10	1.06041	0.0586523	1.04295	0.0420578	0.992286	1	2.28998	0.828544	2.31134	0.837826	9.66018e-10	6.12402e-10
Hepatitis B	Schizophrenia	1.02484e-06	3.50112e-112	1.31727	0.275563	1.42284	0.352655	1.17203e-09	2.7745e-15	2.40404	0.877149	2.38579	0.869531	6.77402e-114	3.50112e-112
Hepatitis B	Systemic sclerosis	1.53726e-21	0.0346396	0.972099	-0.0282976	0.974184	-0.0261553	1	1	1.88764	0.635328	2.02901	0.70755	0.0640641	0.0346396
Hepatitis B	Vogt-Koyanagi-Harada syndrome	3.33387e-06	0.0244915	0.00266982	-5.92575	1.70311e-05	-10.9805	1	1	13.6456	2.61342	13.4206	2.59679	0.023375	0.0244915
Hepatocellular carcinoma	Kidney disease	5.53697e-15	4.54225e-191	1.17639	0.162446	1.20294	0.184768	2.90616e-13	2.62172e-17	1.78553	0.579717	1.91653	0.650514	1.18306e-145	4.54225e-191
Hepatocellular carcinoma	Lung adenocarcinoma	1.41549e-15	1.00547e-08	0.491922	-0.709435	0.521612	-0.650831	1.32166e-06	1.05378e-05	1.58317	0.459429	1.75653	0.563342	4.0926e-06	1.00547e-08
Hepatocellular carcinoma	Lung Cancer	1.69811e-14	0	2.70901	0.996583	2.82286	1.03775	5.88811e-155	1.68201e-168	4.9327	1.59589	5.52773	1.70978	0	0
Hepatocellular carcinoma	Marginal zone lymphoma	1.70476e-09	0.0294427	2.02401	0.705082	2.12851	0.755423	0.299847	0.254189	3.57345	1.27353	4.2742	1.4526	0.0638318	0.0294427
Hepatocellular carcinoma	Psoriasis	1.83857e-06	1.27915e-06	1.60329	0.472058	1.61013	0.476314	2.44593e-05	2.02414e-05	2.01201	0.699136	1.95819	0.672023	4.3509e-07	1.27915e-06
Hodgkin disease	Hypothyroidism	1.53643e-11	0	2.60333	0.956793	2.60937	0.959109	2.38024e-200	2.275e-204	3.13967	1.14412	3.50671	1.25468	2.45707e-264	0
Hodgkin disease	Interstitial lung disease	1.85541e-09	0.00302813	1.51041	0.412382	1.55396	0.440808	0.0179458	0.0105208	1.81182	0.59433	1.87908	0.63078	0.00561148	0.00302813
Hodgkin disease	Large B-cell lymphoma	0.000118249	6.17329e-05	6.89982	1.9315	7.02136	1.94896	6.17329e-05	5.14553e-05	0.00230933	-6.0708	7.23517e-05	-9.53397	1	1
Hodgkin disease	Lung Cancer	8.76287e-21	3.87613e-11	1.35849	0.306371	1.34357	0.295327	5.30446e-05	9.93852e-05	1.60656	0.474095	1.77936	0.576256	7.4771e-08	3.87613e-11
Hodgkin disease	Lymphoma	1.01202e-13	1.8566e-07	2.56603	0.94236	2.54891	0.935664	1.8566e-07	2.28614e-07	2.91127	1.06859	3.11763	1.13707	0.00212816	0.000985816
Hodgkin disease	Marginal zone lymphoma	6.0141e-05	0.0112958	4.18414	1.4313	4.26267	1.4499	0.0112958	0.0101413	4.73673	1.55535	5.4058	1.68747	0.0642472	0.0408187
Hypertension	Intracranial aneurysm	0.00175593	7.12324e-129	1.72509	0.545277	1.73499	0.551003	7.12324e-129	2.37582e-128	1.42578	0.354721	1.47261	0.387037	6.45066e-52	1.35262e-61
Hypertriglyceridemia	Metabolic syndrome	9.67096e-05	0	9.95014	2.29759	9.85128	2.2876	0	0	19.6133	2.97621	19.94	2.99273	0	0
Hypothyroidism	Idiopathic membranous nephropathy	1.80464e-10	3.77057e-27	1.68265	0.52037	1.64048	0.49499	5.52556e-18	2.91216e-16	2.35186	0.855206	2.11861	0.750762	3.46435e-35	3.77057e-27
Hypothyroidism	IgA nephropathy	4.81596e-08	5.56415e-09	1.27266	0.24111	1.26915	0.238344	0.000517757	0.000590544	1.71196	0.537637	1.64801	0.499566	3.56941e-10	5.56415e-09
Hypothyroidism	Lupus erythematosus	6.36443e-08	3.94682e-205	1.54654	0.436019	1.49186	0.400026	3.94682e-205	2.84456e-170	1.68686	0.522869	1.42546	0.354492	0	2.23639e-186
Hypothyroidism	Myasthenia gravis	1.16421e-12	2.10774e-94	1.54901	0.437614	1.50734	0.410346	3.90423e-45	1.02333e-39	2.00087	0.693581	1.85761	0.619293	7.2545e-118	2.10774e-94
Hypothyroidism	Narcolepsy	3.43996e-08	3.24477e-41	1.58804	0.4625	1.52563	0.422404	7.75225e-21	2.46621e-17	2.13989	0.760752	1.90671	0.645382	3.05872e-57	3.24477e-41
Hypothyroidism	Nodular sclerosis Hodgkin lymphoma	6.68394e-10	0.0737352	0.752008	-0.285009	0.76717	-0.265046	0.238214	0.287669	2.03683	0.711396	1.80715	0.591752	0.0240128	0.0737352
Hypothyroidism	Rheumatoid arthritis	1.65493e-09	0	1.2154	0.195069	1.1828	0.167882	3.35362e-121	9.14575e-90	1.51944	0.418345	1.43023	0.357838	0	0
Hypothyroidism	Schizophrenia	0.000417212	0	1.53657	0.429549	1.50266	0.407234	0	0	1.76623	0.568847	1.49885	0.404696	0	0
Hypothyroidism	Systemic lupus erythematosus	1.18938e-09	1.60873e-197	1.54942	0.437884	1.49547	0.40244	1.60873e-197	1.84782e-164	1.68141	0.51963	1.41902	0.349963	0	1.8569e-174
Hypothyroidism	Systemic sclerosis	2.26775e-12	1.27787e-90	1.60447	0.472793	1.55669	0.442561	2.59817e-47	3.62732e-41	2.16357	0.771759	1.96964	0.677853	1.78803e-118	1.27787e-90
Hypothyroidism	Type 1 diabetes	1.90671e-08	0	1.77768	0.575308	1.78367	0.578676	0	0	2.09396	0.739055	1.89835	0.640987	0	0
Hypothyroidism	Vitiligo	4.99127e-09	4.96799e-66	2.38594	0.869595	2.27723	0.822958	3.95692e-34	3.28124e-30	3.60034	1.28103	3.45158	1.23883	1.75604e-70	4.96799e-66
Hypothyroidism	Vogt-Koyanagi-Harada syndrome	1.45375e-06	0.00192901	0.666564	-0.405619	0.637567	-0.450096	0.871968	0.82626	3.11644	1.13669	2.97052	1.08874	0.00102048	0.00192901
Hypothyroidism	Wegener granulomatosis	0.0419069	8.94998e-27	1.46711	0.383297	1.44209	0.366091	4.43805e-12	4.41459e-11	2.05671	0.721107	1.88174	0.632196	1.4578e-34	8.94998e-27
Idiopathic membranous nephropathy	IgA nephropathy	1.95399e-10	4.98116e-61	15.6721	2.75188	15.6571	2.75093	1.41548e-31	1.41066e-31	64.9857	4.17417	66.1678	4.19219	1.61676e-60	4.98116e-61
Idiopathic membranous nephropathy	Interstitial lung disease	3.95921e-09	3.33366e-19	2.73618	1.00656	2.86985	1.05426	1.47443e-08	2.68462e-09	5.90012	1.77497	6.08519	1.80586	1.40597e-18	3.33366e-19
Idiopathic membranous nephropathy	Kidney disease	1.71961e-13	0.00083802	1.49592e+08	18.8234	1.17724e+06	13.9787	1	0.0360225	6.91741e+08	20.3547	981172	13.7965	1	0.00083802
Idiopathic membranous nephropathy	Lupus erythematosus	2.48376e-27	1.37172e-132	4.3379	1.46739	4.14497	1.4219	5.21514e-43	3.46728e-40	10.8668	2.38572	10.8151	2.38095	3.54798e-133	1.37172e-132
Idiopathic membranous nephropathy	Lymphoma	2.6397e-12	0.0118044	1.15203	0.141529	1.15493	0.14404	1	1	3.89812	1.36049	4.14107	1.42095	0.0166955	0.0118044
Idiopathic membranous nephropathy	Metabolic syndrome	7.98594e-09	0.00258288	0.903098	-0.101924	0.852344	-0.159765	1	1	3.84291	1.34623	3.88126	1.35616	0.00280462	0.00258288
Idiopathic membranous nephropathy	Multiple myeloma	0.00125945	0.000607625	1.39851	0.335406	1.37453	0.318114	0.40716	0.442993	2.89643	1.06348	3.25767	1.18101	0.00230908	0.000607625
Idiopathic membranous nephropathy	Nodular sclerosis Hodgkin lymphoma	1.05618e-18	0.00280417	1.74635	0.557528	1.88402	0.633409	0.867465	0.807264	26.3156	3.27016	27.1264	3.30051	0.00310256	0.00280417
Idiopathic membranous nephropathy	Psoriasis	1.78577e-12	0.00174566	1.96896	0.677504	1.88462	0.633725	0.00174566	0.00370062	1.50059	0.405859	1.50106	0.406174	0.370977	0.370469
Idiopathic membranous nephropathy	Rheumatoid arthritis	1.36131e-17	4.99269e-07	1.21164	0.191974	1.18473	0.169519	0.353623	0.439357	2.09456	0.739345	2.22019	0.797595	3.63688e-06	4.99269e-07
Idiopathic membranous nephropathy	Sarcoidosis	3.51893e-06	0.00456793	1.33354	0.287837	1.25286	0.22543	0.487105	0.648834	2.67902	0.98545	2.7098	0.996875	0.00512537	0.00456793
Idiopathic membranous nephropathy	Systemic lupus erythematosus	5.16964e-19	4.07007e-126	4.37286	1.47542	4.18028	1.43038	3.37998e-42	1.85115e-39	10.7492	2.37483	10.6944	2.36972	1.03196e-126	4.07007e-126
Idiopathic membranous nephropathy	Systemic sclerosis	5.58603e-15	1.46452e-05	1.17379	0.160234	1.14158	0.132411	1	1	6.26237	1.83456	6.57197	1.88281	2.52071e-05	1.46452e-05
Idiopathic membranous nephropathy	Wegener granulomatosis	0.000350645	2.69576e-07	6.79508	1.9162	6.69492	1.90135	2.69576e-07	3.37387e-07	6.83526	1.92209	7.00988	1.94732	0.00251082	0.00216061
IgA nephropathy	Interstitial lung disease	4.25468e-06	2.00068e-05	2.50299	0.917486	2.50677	0.918995	4.19761e-05	4.06701e-05	3.63643	1.291	3.72473	1.31499	2.92733e-05	2.00068e-05
IgA nephropathy	Kidney disease	1.48946e-15	0.0126462	9.33178e+07	18.3515	968342	13.7833	1	0.0928799	3.15718e+08	19.5704	755671	13.5354	1	0.0126462
IgA nephropathy	Lupus erythematosus	6.00865e-17	2.01405e-17	2.54751	0.935117	2.56164	0.940647	1.37908e-07	1.19148e-07	4.74372	1.55682	4.55523	1.51628	2.72233e-18	2.01405e-17
IgA nephropathy	Lymphoma	1.74811e-14	0.0443256	1.72898	0.54753	1.72748	0.546661	0.281012	0.282018	3.82727	1.34215	3.89239	1.35902	0.0475798	0.0443256
IgA nephropathy	Marginal zone lymphoma	0.000394465	7.67187e-05	8.28444	2.11438	8.39793	2.12798	0.000788537	0.000722168	19.1943	2.95461	20.061	2.99878	0.000100076	7.67187e-05
IgA nephropathy	Rheumatoid arthritis	2.22707e-12	0.0442523	1.36628	0.312088	1.36633	0.312128	0.0611447	0.0611441	1.57659	0.455266	1.58133	0.458269	0.0456931	0.0442523
IgA nephropathy	Sarcoidosis	0.000110149	5.63486e-11	2.96572	1.08712	2.9548	1.08343	1.70545e-05	1.83831e-05	6.05369	1.80067	5.80674	1.75902	1.84954e-11	5.63486e-11
IgA nephropathy	Systemic lupus erythematosus	1.16129e-10	2.92865e-18	2.59217	0.952494	2.60785	0.958525	1.19791e-07	1.02257e-07	4.93146	1.59563	4.73326	1.55461	3.68187e-19	2.92865e-18
IgA nephropathy	Systemic sclerosis	5.38832e-12	0.0408558	1.3677	0.313129	1.36456	0.31083	0.880008	0.883247	4.03249	1.39438	3.9664	1.37786	0.0379737	0.0408558
IgA nephropathy	Vitiligo	1.82287e-09	0.00030133	7.08107	1.95743	7.08262	1.95764	0.00030133	0.000300865	6.24629	1.83199	6.18149	1.82156	0.141742	0.144697
IgA nephropathy	Wegener granulomatosis	5.44367e-06	1.74688e-126	43.9488	3.78303	43.9465	3.78297	1.74688e-126	1.7803e-126	55.1035	4.00921	54.7913	4.00353	2.6779e-59	4.17148e-59
Inflammatory bowel disease	Lupus erythematosus	0.00720075	2.27613e-58	1.33104	0.285958	1.29749	0.260428	1.03007e-10	4.89035e-09	1.69914	0.530123	1.69786	0.52937	1.56044e-58	2.27613e-58
Inflammatory bowel disease	Narcolepsy	1.11601e-05	2.3949e-05	0.835874	-0.179277	0.822626	-0.195253	0.540451	0.482023	1.82912	0.603833	1.83022	0.604436	2.44191e-05	2.3949e-05
Inflammatory bowel disease	Rheumatoid arthritis	2.60546e-05	0	1.86628	0.62395	1.83216	0.605496	7.85937e-143	1.09634e-134	2.35507	0.856571	2.46114	0.900624	0	0
Inflammatory bowel disease	Systemic lupus erythematosus	0.00022537	4.72139e-54	1.30065	0.262867	1.26935	0.238509	1.10058e-08	2.62086e-07	1.68305	0.520608	1.68209	0.520038	3.60361e-54	4.72139e-54
Inflammatory skin disease	Psoriasis	2.08233e-05	2.41339e-227	4.14552	1.42203	3.90224	1.36155	2.41339e-227	1.26994e-208	2.02529	0.705715	1.92512	0.65499	2.46962e-96	2.74263e-83
Inflammatory skin disease	Vitiligo	1.07317e-05	2.03636e-15	4.19843	1.43471	4.03647	1.39537	1.45209e-13	8.04189e-13	3.23164	1.17299	3.09733	1.13054	1.73663e-16	2.03636e-15
Interstitial lung disease	Kawasaki disease	0.00249522	0.0142807	2.87019	1.05438	0.882745	-0.124719	0.0142807	1	3.88174	1.35628	1.6601	0.506877	0.0448886	0.635297
Interstitial lung disease	Kidney disease	8.80456e-11	0	2.22223	0.79851	2.20173	0.789244	0	0	3.06464	1.11993	2.99935	1.0984	0	0
Interstitial lung disease	Lupus erythematosus	1.66495e-05	3.02252e-18	1.73903	0.55333	1.70917	0.53601	3.02252e-18	3.74047e-17	1.86181	0.621547	1.74019	0.553996	2.03031e-20	1.96748e-16
Interstitial lung disease	Lymphoma	3.05449e-08	0.0219442	1.11875	0.112215	1.11332	0.107346	0.691108	0.71699	1.75437	0.562112	1.67403	0.515236	0.0111205	0.0219442
Interstitial lung disease	Multiple myeloma	0.00596299	2.61164e-07	1.32636	0.282435	1.31647	0.274953	0.00533167	0.00690428	1.83767	0.608497	1.72083	0.542807	5.88935e-09	2.61164e-07
Interstitial lung disease	Rheumatoid arthritis	2.0417e-07	1.4951e-25	1.46317	0.380607	1.43811	0.363331	1.16326e-20	6.98207e-19	1.6729	0.514557	1.59638	0.467739	8.29998e-31	1.4951e-25
Interstitial lung disease	Sarcoidosis	0.000143754	5.56398e-19	1.75892	0.5647	1.7449	0.556697	6.20484e-09	1.04396e-08	2.5598	0.939927	2.36199	0.859504	1.6081e-22	5.56398e-19
Interstitial lung disease	Systemic lupus erythematosus	1.03249e-07	8.00363e-18	1.74714	0.55798	1.716	0.539998	8.00363e-18	9.99489e-17	1.87866	0.630557	1.75449	0.562179	2.13831e-20	2.01001e-16
Interstitial lung disease	Systemic sclerosis	7.17606e-08	1.7286e-36	3.79444	1.33354	3.76011	1.32445	1.7286e-36	5.40864e-36	4.35145	1.47051	4.07852	1.40573	2.07892e-28	5.13016e-26
Interstitial lung disease	Typhoid fever	3.21918e-05	0.0570046	0.00252297	-5.98232	4.67604e-06	-12.2731	1	1	10.2399	2.32629	9.60358	2.26214	0.0492994	0.0570046
Kawasaki disease	Lung adenocarcinoma	0.000293158	0.168884	5.87463	1.77064	0.530612	-0.633724	0.168884	0.804603	14.2282	2.65523	1.24546	0.219504	0.0208163	1
Kawasaki disease	Parkinson disease	0.00119897	0.614267	0.000459948	-7.6844	0.00273935	-5.90003	1	1	15.7582	2.75736	2.49461	0.914133	0.0155721	0.614267
Kawasaki disease	Rheumatoid arthritis	5.92573e-09	0.00329412	2.98507	1.09362	0.863159	-0.147157	0.0687489	1	7.81156	2.0556	2.96771	1.08779	4.69689e-09	0.00329412
Kidney disease	Large B-cell lymphoma	7.21906e-06	2.24938e-08	0.952599	-0.0485614	0.956794	-0.0441668	0.976774	1	2.34458	0.852107	2.33769	0.849164	1.64799e-08	2.24938e-08
Kidney disease	Lupus erythematosus	6.89092e-11	0	2.29579	0.831075	2.21987	0.797448	0	0	2.30822	0.836477	2.0823	0.733473	0	0
Kidney disease	Lymphoma	2.91558e-16	2.65058e-70	0.836185	-0.178906	0.814264	-0.205471	6.18142e-13	1.47596e-16	1.7323	0.549447	1.68629	0.522529	7.48813e-79	2.65058e-70
Kidney disease	Marginal zone lymphoma	1.35018e-05	4.13829e-16	0.980407	-0.0197878	0.963016	-0.0376848	1	0.904847	1.95122	0.668455	1.9308	0.657934	8.99103e-17	4.13829e-16
Kidney disease	Metabolic syndrome	0.00202982	3.97475e-281	1.52597	0.422627	1.48219	0.393524	3.77383e-84	1.9561e-71	2.44474	0.893938	2.33297	0.847142	0	3.97475e-281
Kidney disease	Sarcoidosis	5.82248e-08	6.29446e-167	1.24704	0.220774	1.19575	0.178772	1.66992e-33	1.88555e-21	1.73514	0.551091	1.5729	0.452924	2.74446e-255	6.29446e-167
Kidney disease	Systemic lupus erythematosus	2.02544e-13	0	2.37447	0.864775	2.29675	0.831495	0	0	2.35279	0.855601	2.12	0.751414	0	0
Kidney disease	Systemic sclerosis	4.42166e-15	1.90795e-70	1.24691	0.22067	1.19372	0.177075	5.19111e-13	1.61389e-08	1.78321	0.578417	1.70031	0.530808	5.99539e-85	1.90795e-70
Kidney disease	Type 1 diabetes	2.71446e-12	0	3.50581	1.25442	3.4386	1.23507	0	0	3.1715	1.1542	3.06799	1.12102	0	0
Kidney disease	Type 2 diabetes	0.000463607	0	2.05793	0.721701	2.02194	0.704059	0	0	1.79694	0.586084	1.72615	0.545891	0	0
Kidney disease	Wegener granulomatosis	4.34645e-07	0	5.61994	1.72632	5.64605	1.73096	0	0	6.76618	1.91194	6.75338	1.91004	0	0
Large B-cell lymphoma	Marginal zone lymphoma	8.52729e-16	0.000124748	0.000313139	-8.06886	0.000421943	-7.77064	1	1	61.0492	4.11168	62.3262	4.13238	0.000135746	0.000124748
Large B-cell lymphoma	Multiple myeloma	9.21046e-05	0.00137726	4.2366	1.44376	4.24347	1.44538	0.00137726	0.00134254	1.93417e-05	-10.8532	0.000748081	-7.198	1	1
Large B-cell lymphoma	Vitiligo	0.0247075	0.000803723	8.94809	2.19144	8.8616	2.18173	0.0649075	0.0664187	39.0526	3.66491	38.6076	3.65345	0.000770122	0.000803723
Laryngeal squamous cell carcinoma	Lung adenocarcinoma	9.25332e-08	6.97996e-43	2.8413	1.04426	2.98038	1.09205	9.07373e-14	5.67453e-15	4.64677	1.53617	5.19955	1.64857	1.95562e-37	6.97996e-43
Laryngeal squamous cell carcinoma	Lung Cancer	5.61243e-07	3.37375e-187	5.22907	1.65423	5.41595	1.68935	2.41086e-133	1.23259e-139	6.73744	1.90768	7.63429	2.03265	6.83502e-165	3.37375e-187
Leprosy	Myasthenia gravis	3.18965e-12	0.00522107	23.4394	3.15442	22.5097	3.11395	0.00522107	0.00592447	8.6142e-05	-9.35951	0.00517591	-5.26374	1	1
Leprosy	Systemic sclerosis	4.31945e-12	0.0015502	34.6785	3.54612	33.129	3.50041	0.0015502	0.00179283	0.000119439	-9.03271	0.0102174	-4.58366	1	1
Lung adenocarcinoma	Nicotine dependence	2.75944e-05	0	1.67683	0.516906	1.54852	0.4373	0	2.97051e-305	1.32377	0.280483	0.999819	-0.000181276	1.10875e-138	1
Lung adenocarcinoma	Sudden cardiac arrest	0.00439887	5.44072e-78	1.54586	0.435583	1.55081	0.43878	1.56222e-23	6.88205e-24	1.81573	0.596488	1.89126	0.637243	2.65049e-68	5.44072e-78
Lung Cancer	Marginal zone lymphoma	2.90408e-11	0.00644725	1.09541	0.0911324	1.12827	0.120687	0.902769	0.770138	1.6979	0.52939	1.85615	0.618504	0.0236843	0.00644725
Lupus erythematosus	Lymphoma	5.3594e-12	0.0147371	1.10158	0.0967492	1.06645	0.0643339	0.749149	0.936538	1.39874	0.335571	1.60985	0.476139	0.111812	0.0147371
Lupus erythematosus	Marginal zone lymphoma	3.70544e-14	1.10206e-08	3.33234	1.20367	3.53812	1.26359	7.88031e-06	2.54577e-06	3.85288	1.34882	5.03753	1.61692	2.37812e-06	1.10206e-08
Lupus erythematosus	Migraine	0.000806825	3.10718e-104	1.71252	0.537968	1.80885	0.592689	3.10718e-104	2.62047e-126	1.18698	0.171414	1.2298	0.206851	4.7754e-21	3.1154e-30
Lupus erythematosus	Multiple sclerosis	0.000396564	1.06804e-68	1.2629	0.233412	1.25139	0.224255	0.000176848	0.000332883	1.92425	0.654537	1.92829	0.656633	2.84338e-68	1.06804e-68
Lupus erythematosus	Myasthenia gravis	2.8046e-20	1.28357e-115	3.30235	1.19463	3.70309	1.30917	9.94832e-45	1.01203e-53	4.44179	1.49106	5.09867	1.62898	2.38996e-97	1.28357e-115
Lupus erythematosus	Narcolepsy	3.0788e-09	6.08849e-20	2.106	0.744789	2.07916	0.731962	3.06572e-06	4.61702e-06	2.8958	1.06326	2.91395	1.06951	1.004e-19	6.08849e-20
Lupus erythematosus	Psoriasis	8.05459e-09	2.42173e-19	1.68836	0.523756	1.64764	0.499344	1.00929e-16	2.66641e-15	1.65448	0.503484	1.66224	0.508167	5.26448e-19	2.42173e-19
Lupus erythematosus	Rheumatoid arthritis	4.92071e-12	0	7.81347	2.05585	7.88968	2.06556	0	0	10.5439	2.35555	11.4362	2.43678	0	0
Lupus erythematosus	Sarcoidosis	0.00522952	1.1797e-136	1.68908	0.524185	1.63215	0.4899	1.13872e-15	8.36566e-14	3.22832	1.17196	3.26765	1.18407	6.05838e-134	1.1797e-136
Lupus erythematosus	Systemic sclerosis	1.40771e-12	0	11.8327	2.47087	11.6449	2.45487	0	0	14.6432	2.68398	15.6286	2.7491	0	0
Lupus erythematosus	Ulcerative colitis	2.22276e-08	1.61275e-09	1.09294	0.088873	1.10229	0.0973914	0.452424	0.38839	1.52489	0.421921	1.52874	0.424445	2.03503e-09	1.61275e-09
Lupus erythematosus	Vitiligo	3.58112e-07	1.6628e-39	4.42015	1.48617	4.35557	1.47146	2.79005e-21	6.83982e-21	6.77048	1.91257	6.77369	1.91305	1.71024e-39	1.6628e-39
Lymphoma	Psoriasis	0.0298671	3.7481e-05	0.976346	-0.0239379	0.975424	-0.0248833	1	1	2.18166	0.780088	2.08568	0.735097	1.09267e-05	3.7481e-05
Lymphoma	Rheumatoid arthritis	7.05639e-13	1.72262e-05	1.00656	0.00654088	1.00428	0.00427335	1	1	1.61068	0.476658	1.55154	0.439251	2.56932e-06	1.72262e-05
Lymphoma	Sarcoidosis	4.18683e-08	0.013505	1.60671	0.474188	1.59684	0.468024	0.013505	0.0149808	2.1395	0.76057	1.80326	0.589596	0.00266081	0.0254325
Lymphoma	Systemic lupus erythematosus	9.30698e-15	0.228877	0.995467	-0.00454289	1.0305	0.030042	1	1	1.53227	0.426753	1.32896	0.284397	0.04283	0.228877
Lymphoma	Systemic sclerosis	2.74161e-14	0.00261968	0.87754	-0.130633	0.868794	-0.140649	1	0.99101	3.36225	1.21261	3.02349	1.10641	0.000846503	0.00261968
Major mood disorders	Osteoarthritis	0.000311898	0	0.962592	-0.0381259	0.977706	-0.0225461	2.22676e-09	0.000727629	1.50386	0.408032	1.8399	0.609709	0	0
Major mood disorders	Schizophrenia	0.0297457	0	3.65031	1.29481	3.52571	1.26008	0	0	7.38556	1.99953	7.32802	1.99171	0	0
Marginal zone lymphoma	Multiple myeloma	5.99677e-05	0.00284093	1.7404	0.554113	1.71327	0.538405	0.274526	0.294004	3.68077	1.30312	3.49417	1.2511	0.00175332	0.00284093
Marginal zone lymphoma	Psoriasis	7.07137e-14	6.1197e-05	1.20471	0.186236	1.14298	0.133637	0.948295	1	4.60901	1.52801	4.2062	1.43656	1.80724e-05	6.1197e-05
Marginal zone lymphoma	Rheumatoid arthritis	4.95875e-11	0.000428632	1.52118	0.419483	1.48384	0.394636	0.0608073	0.0825509	2.37984	0.867034	2.21236	0.794062	0.000100761	0.000428632
Marginal zone lymphoma	Systemic lupus erythematosus	5.69995e-10	8.45959e-07	3.73872	1.31874	3.51928	1.25826	8.45959e-07	2.77424e-06	5.27231	1.66247	4.01749	1.39066	4.0128e-09	1.08598e-06
Marginal zone lymphoma	Systemic sclerosis	9.25035e-05	6.50923e-05	3.18843	1.15953	2.98339	1.09306	0.0979002	0.124287	10.0746	2.31002	8.52886	2.14346	1.45819e-05	6.50923e-05
Metabolic syndrome	Narcolepsy	0.00598631	0.0149808	2.15258	0.766666	2.15262	0.766688	0.0149808	0.0149774	1.70707	0.534776	1.69332	0.526693	0.420911	0.431927
Metabolic syndrome	Prostate cancer	0.0130811	0.0387378	11.3437	2.42866	12.6451	2.53727	0.0387378	0.0297199	0.00395389	-5.53306	7.30532e-07	-14.1295	1	1
Metabolic syndrome	Psoriasis	2.09449e-08	2.04685e-13	1.86996	0.625916	1.86363	0.622526	5.01607e-10	6.28011e-10	2.56007	0.940034	2.54457	0.933962	1.40827e-13	2.04685e-13
Metabolic syndrome	Schizophrenia	0.000127835	3.54584e-14	0.865051	-0.144967	0.913027	-0.0909894	0.0798814	0.344533	1.68202	0.519995	1.64804	0.499585	2.97157e-15	3.54584e-14
Metabolic syndrome	Type 1 diabetes	0.0034825	2.19215e-09	1.00345	0.00343944	1.1695	0.156579	1	0.150971	1.76692	0.569237	1.79238	0.583546	5.75313e-09	2.19215e-09
Metabolic syndrome	Type 2 diabetes	0.00237978	0	4.6503	1.53693	4.45951	1.49504	0	0	5.2204	1.65257	5.21264	1.65109	0	0
Metabolic syndrome	Ulcerative colitis	0.000135337	0.0195618	0.598652	-0.513075	0.606937	-0.49933	0.0195618	0.0237107	1.56373	0.447072	1.55776	0.443246	0.0431189	0.0453317
Multiple myeloma	Vitiligo	0.0312721	0.0457817	0.779402	-0.249229	0.770946	-0.260137	0.91462	0.898071	2.805	1.0314	2.60467	0.957307	0.0288935	0.0457817
Multiple sclerosis	Myasthenia gravis	1.69477e-07	3.40735e-36	2.39359	0.872793	2.51065	0.920542	2.58611e-14	8.56846e-16	3.0037	1.09985	3.43562	1.2342	5.57007e-29	3.40735e-36
Multiple sclerosis	Narcolepsy	7.29504e-07	6.02647e-40	2.93658	1.07724	2.94751	1.08096	1.50126e-13	1.20845e-13	4.49271	1.50246	4.49354	1.50264	6.20163e-40	6.02647e-40
Multiple sclerosis	Systemic lupus erythematosus	8.74329e-05	4.85203e-69	1.26865	0.237952	1.28253	0.248833	0.000163696	7.52352e-05	1.94979	0.667721	1.94619	0.665874	2.06293e-69	4.85203e-69
Myasthenia gravis	Narcolepsy	6.32332e-16	0.0093991	2.52018	0.924331	2.49199	0.913083	0.0093991	0.0104615	2.50888	0.919835	2.3603	0.858787	0.0361653	0.0539744
Myasthenia gravis	Prostate cancer	6.11777e-08	0.0555981	0.00193372	-6.24831	2.78665e-07	-15.0933	1	1	12.0468	2.4888	9.7215	2.27434	0.0326218	0.0555981
Myasthenia gravis	Rheumatoid arthritis	6.15322e-19	3.91828e-14	1.36144	0.30854	1.37801	0.320642	6.23105e-05	2.99697e-05	1.73155	0.549017	1.74243	0.555281	7.27986e-14	3.91828e-14
Myasthenia gravis	Sarcoidosis	3.10131e-05	0.0172345	1.16276	0.150793	1.11237	0.106491	0.750598	0.914398	1.88153	0.632086	1.66948	0.512515	0.00241067	0.0172345
Myasthenia gravis	Systemic lupus erythematosus	7.23163e-19	5.09765e-99	3.76588	1.32598	3.34513	1.20751	2.71222e-53	3.39677e-44	5.23423	1.65522	4.54834	1.51476	1.22976e-117	5.09765e-99
Myasthenia gravis	Systemic sclerosis	1.07759e-16	0.00284505	2.22706	0.800683	2.18896	0.783425	0.00284505	0.00360579	2.03436	0.710181	1.97689	0.681527	0.0576147	0.0713055
Myasthenia gravis	Vitiligo	1.68285e-09	3.72714e-22	6.0772	1.80454	5.98917	1.78995	5.72192e-08	7.40951e-08	14.673	2.68601	14.2075	2.65377	1.12655e-22	3.72714e-22
Narcolepsy	Parkinson disease	1.47836e-05	0.00487029	1.58566	0.460999	1.7759	0.574305	0.00624229	0.000470236	1.36525	0.311338	1.65053	0.501099	0.111063	0.00487029
Narcolepsy	Psoriasis	0.0174908	0.000307592	1.70138	0.53144	1.70272	0.532228	0.0115855	0.0114427	2.15409	0.76737	2.15146	0.766146	0.000300203	0.000307592
Narcolepsy	Rheumatoid arthritis	1.02346e-11	6.95955e-10	1.69006	0.524761	1.73219	0.549387	1.25901e-06	3.5126e-07	1.85334	0.616991	1.9737	0.67991	2.64551e-08	6.95955e-10
Narcolepsy	Sarcoidosis	3.8195e-05	6.84883e-08	1.73774	0.552587	1.73345	0.550112	0.0869101	0.088752	3.14021	1.14429	3.17249	1.15452	9.09575e-08	6.84883e-08
Narcolepsy	Systemic lupus erythematosus	1.37374e-11	5.45737e-21	2.1795	0.779097	2.21002	0.792999	9.60707e-07	6.00059e-07	3.01931	1.10503	3.00009	1.09864	3.2233e-21	5.45737e-21
Narcolepsy	Ulcerative colitis	8.5715e-10	0.0011785	0.973553	-0.0268027	0.98008	-0.0201214	1	1	2.25452	0.812937	2.25719	0.814123	0.00120071	0.0011785
Nicotine dependence	Schizophrenia	0.00614467	0	1.95518	0.670481	2.0238	0.704975	0	0	1.58408	0.460007	1.56478	0.447746	0	0
Parkinson disease	Progressive supranuclear palsy	7.27255e-17	0	12.6715	2.53935	12.3415	2.51297	0	0	13.9418	2.63489	13.3845	2.5941	0	0
Parkinson disease	Schizophrenia	0.00288371	0	4.05253	1.39934	2.72762	1.00343	0	0	3.62817	1.28873	1.92325	0.654016	0	5.16039e-224
Psoriasis	Rheumatoid arthritis	5.96404e-08	0	3.12492	1.13941	3.19453	1.16144	0	0	4.0159	1.39026	4.16671	1.42713	0	0
Psoriasis	Systemic lupus erythematosus	6.83782e-06	6.40326e-15	1.60663	0.474141	1.64939	0.500403	5.35896e-13	2.34634e-14	1.59216	0.46509	1.58434	0.46017	3.20508e-15	6.40326e-15
Psoriasis	Ulcerative colitis	0.0124075	6.6885e-24	1.43762	0.362989	1.45632	0.375914	4.68039e-06	1.98651e-06	2.23049	0.802223	2.23143	0.802645	7.05462e-24	6.6885e-24
Psoriasis	Vitiligo	0.0141285	1.31558e-31	4.93742	1.59684	4.93991	1.59735	1.12141e-17	1.0982e-17	8.07021	2.08818	8.06881	2.08801	1.29707e-31	1.31558e-31
Psychosis	Schizophrenia	0.0496485	0.134136	1.16928e+09	20.8797	4.61368e+09	22.2523	0.134136	0.519565	2.12347e+09	21.4763	1.4722e+10	23.4126	0.0157619	0.454682
Rheumatoid arthritis	Sarcoidosis	3.2016e-05	8.67186e-122	1.95952	0.6727	1.89778	0.640683	8.32917e-52	5.59994e-47	2.68679	0.988348	2.49779	0.915406	5.98891e-142	8.67186e-122
Rheumatoid arthritis	Systemic lupus erythematosus	2.75538e-18	0	7.96737	2.07535	7.90322	2.06727	0	0	11.5296	2.44491	10.63	2.36368	0	0
Rheumatoid arthritis	Systemic sclerosis	2.6397e-12	0	4.58139	1.522	4.48158	1.49998	8.80925e-256	4.99259e-248	6.8224	1.92021	6.62358	1.89064	0	0
Rheumatoid arthritis	Ulcerative colitis	2.96149e-11	2.32297e-65	1.53519	0.428652	1.55321	0.440321	3.97319e-23	2.45921e-24	2.11474	0.748934	2.07725	0.731047	1.96846e-68	2.32297e-65
Rheumatoid arthritis	Vitiligo	1.78521e-06	6.45637e-13	2.6814	0.986339	2.63574	0.969164	6.45637e-13	1.80484e-12	2.37711	0.865884	2.34424	0.85196	1.771e-06	2.61008e-06
Sarcoidosis	Systemic lupus erythematosus	6.12482e-06	4.23861e-131	1.61154	0.477189	1.67151	0.513727	1.701e-12	2.4673e-14	3.28264	1.18865	3.24463	1.177	1.23878e-133	4.23861e-131
Sarcoidosis	Systemic sclerosis	1.50397e-06	3.96468e-27	3.13738	1.14339	3.12197	1.13846	8.29009e-17	1.14552e-16	4.24491	1.44572	4.41921	1.48596	9.97824e-26	3.96468e-27
Sarcoidosis	Ulcerative colitis	7.88703e-06	2.95872e-06	1.11913	0.112551	1.14302	0.133672	0.632819	0.520332	1.75048	0.559891	1.75096	0.560162	2.99641e-06	2.95872e-06
Sarcoidosis	Vitiligo	1.42745e-06	3.51725e-10	2.93271	1.07593	2.96865	1.08811	0.000387148	0.000325428	5.73024	1.74576	5.73252	1.74615	3.56502e-10	3.51725e-10
Systemic lupus erythematosus	Systemic sclerosis	2.33034e-12	0	11.9939	2.4844	11.7836	2.46671	0	0	14.826	2.69638	15.8248	2.76158	0	0
Systemic lupus erythematosus	Ulcerative colitis	5.43308e-12	3.59713e-09	1.09457	0.0903602	1.10303	0.0980571	0.455757	0.399097	1.52341	0.42095	1.52712	0.423381	4.46373e-09	3.59713e-09
Systemic lupus erythematosus	Vitiligo	6.18615e-06	4.82529e-29	3.96557	1.37765	3.90329	1.36182	3.26533e-16	7.13433e-16	5.87175	1.77015	5.87357	1.77046	4.87982e-29	4.82529e-29
Systemic sclerosis	Ulcerative colitis	6.53185e-14	0.0103065	1.31506	0.273879	1.34678	0.297715	0.25898	0.206498	1.84325	0.611532	1.82684	0.602587	0.0090632	0.0103065
Systemic sclerosis	Vitiligo	6.43724e-10	1.52562e-11	7.67402	2.03784	7.65409	2.03524	9.19232e-11	9.71987e-11	11.914	2.47772	11.8603	2.47319	1.41169e-11	1.52562e-11
Systemic sclerosis	Wegener granulomatosis	7.85021e-06	5.57153e-05	1.84143	0.610541	1.83771	0.608519	0.320564	0.322893	5.12438	1.63401	5.10834	1.63087	5.38284e-05	5.57153e-05
Type 1 diabetes	Vitiligo	1.69713e-10	6.49683e-52	3.61537	1.28519	3.31353	1.19802	5.62482e-19	1.2443e-16	6.49424	1.87092	6.45951	1.86555	2.76761e-52	6.49683e-52
Ulcerative colitis	Vitiligo	2.34533e-07	0.0278763	2.1517	0.766258	2.15924	0.769754	0.0278763	0.0270315	1.75263	0.56112	1.75233	0.560944	0.386886	0.387095
Ulcerative colitis	Wegener granulomatosis	0.00145283	4.12853e-08	0.839698	-0.174713	0.832647	-0.183145	0.894961	0.874365	3.69246	1.30629	3.73857	1.3187	5.63048e-08	4.12853e-08
